# Supplementary material for: Ni nanocatalysts supported on MIL-53(Al) for DCPD hydrogenation
Source: Royal Society of Chemistry journal article supplement (doi:10.1039/d2ra00238h), 2022-01-01
Supplement: d2ra00238h1.pdf [file d2ra00238h1.pdf]

## Supporting Information

### Ni nanocatalysts supported on MIL-53(Al) for DCPD hydrogenation

Yanan Li, Dandan Jia, Zhiping Tao\* and Jie Zhao

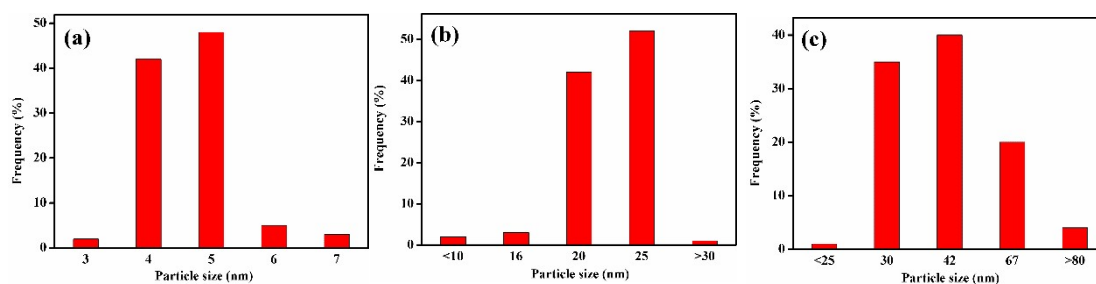

Fig. S1. Ni particle size distribution of (a) Ni-53-300, (b) Ni-53-500 and (c) Ni-53-700

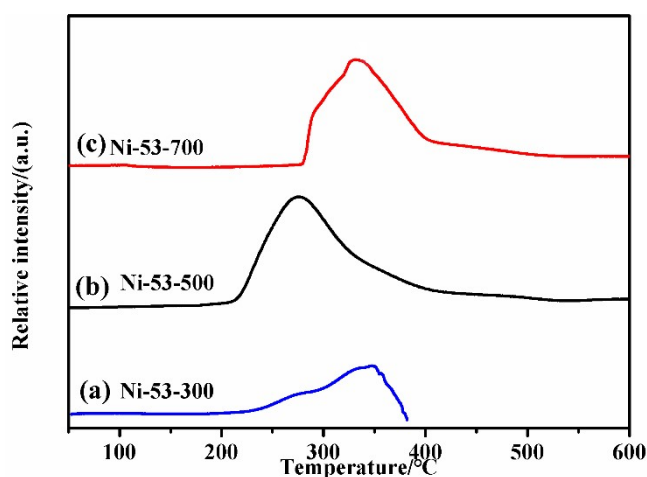

Fig. S2. H<sub>2</sub>-TPR profiles of (a) Ni-53-300, (b) Ni-53-500 and (c) Ni-53-700

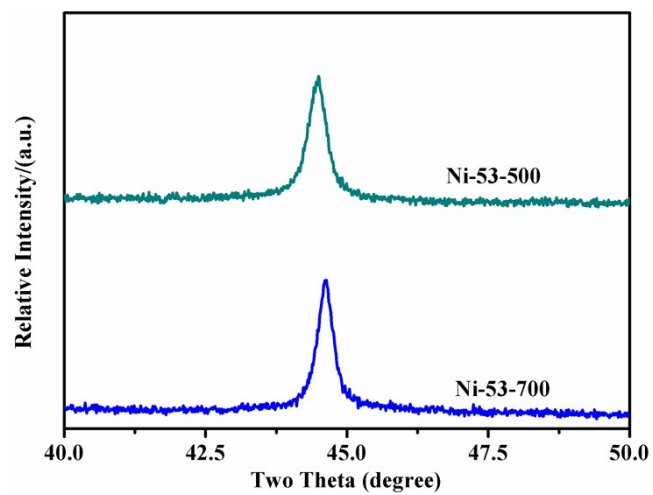

Fig. S3. Ni(111) reflection of Ni-53-500 and Ni-53-700 XRD patterns
